# Supplementary material
Source: PubMed Central journal article supplement (PMC5641217)

## Methods

### **Knight ADRC and ADNI\* studies for clinical disease progression in human AD patients**

The recruitment, assessment, and exclusion criteria methods for the Knight ADRC study has been published previously<sup>30,31</sup>. In the case of the ADNI study, further information was previously described<sup>32</sup>. Knight ADRC individuals were evaluated by Clinical Core personnel at Washington University and in the case of ADNI, each local site was in charge for the evaluation of local participants<sup>32,33</sup>. Briefly, cases received a clinical diagnosis of AD in accordance with the standard criteria<sup>34</sup> and presence or absence of dementia. The severity of dementia was staged with the Clinical Dementia Rating (CDR) where 0 indicates cognitive normality, 0.5 is defined as very mild dementia, 1 is mild dementia, 2 is moderate dementia, and 3 is severe dementia<sup>35</sup>. The scores in each of the six cognitive and functional domains surveyed by the CDR are summed to yield a Sum of Box scores (CDR-SB) ranging from 0 (no impairment) to 18 (maximal impairment)<sup>36</sup>. Sample selection was done as follow: only participants that had an AD diagnosis at the last visit and had a CSF profile compatible with AD were included in our analyses. Non-AD dementia was excluded, as well as individuals in which the CDR at last assessment was equal to 0. Individuals with diagnoses of neurological diseases other than AD were excluded. Not informative longitudinally measured CDR-SB was removed for each participant. After removing the non-informative data points only individuals with at least 1.5 year of follow-up were included. A total of 592 participants were included in the analyses.

Statistical analysis was carried out using R statistical software and the packages nlme was used for linear mixed model. A linear mixed-model repeated measure framework was used to account for correlation between repeated measures in the same individual. Disease progression was modeled as follows:

$$(Y) = \beta_1[\text{SNP} * \text{Time}] + \beta_2 * \text{CDR}_{\text{baseline}} + \beta_3 \text{AGE}_{\text{baseline}} + \beta_4 \text{Gender} + \beta_5 \text{Educacion} \\ + \beta_6 \text{SNP} + \beta_7 \text{Time} + \beta_8 \text{PC1} + \beta_9 \text{PC2}$$

Where: Y was CDR-SB, the change in CDR Sum of Boxes per year baseline CDR, baseline Age, Gender, follow-up time, level of education, and, to avoid the possibility of spurious association due to population substructure, the two first principal components scores were included as covariates.

A portion of the human AD data were obtained from the Alzheimer's Disease Neuroimaging Initiative database (<http://adnioni.usc.edu>). The ADNI was launched in 2003 as a public-private partnership, led by Principal Investigator Michael W. Weiner, MD. The primary goal of ADNI has been to test whether serial magnetic resonance imaging (MRI), biological markers, and clinical and neuropsychological assessment can be combined to measure the progression of mild cognitive impairment (MCI) and early AD. For up-to-date information, see [www.adni-info.org](http://www.adni-info.org).

### **Sample blinding and randomization for animal studies**

## **Randomization**

For biochemical assay and histological staining, the "RAND" function in EXCEL was applied to assign each sample a random number and sorted smallest to largest to generate random order. For gene expression assay, equal number of samples from each group were placed on each chip by complete randomization to avoid cross-chip variability.

## **Blinding**

Quantification of brain volume, AT8 staining, p-tau patterns, and fluorescent staining were performed by individuals blinded to samples IDs. Microglial/astrocytic gene expression assays were performed by collaborators who were blinded to sample IDs. Cell culture images were taken and data quantified by individuals blinded to sample IDs.

## **References**

- 30 Berg, L. et al. Clinicopathologic studies in cognitively healthy aging and Alzheimer's disease: relation of histologic markers to dementia severity, age, sex, and apolipoprotein E genotype. *Arch Neurol* 55, 326-335 (1998).
- 31 Petersen, R. C. et al. Alzheimer's Disease Neuroimaging Initiative (ADNI): clinical characterization. *Neurology* 74, 201-209, doi:10.1212/WNL.0b013e3181cb3e25 (2010).
- 32 Williams, M. M., Roe, C. M. & Morris, J. C. Stability of the Clinical Dementia Rating, 1979-2007. *Arch Neurol* 66, 773-777, doi:10.1001/archneurol.2009.69 (2009).
- 33 Saykin, A. J. et al. Alzheimer's Disease Neuroimaging Initiative biomarkers as quantitative phenotypes: Genetics core aims, progress, and plans. *Alzheimers Dement* 6, 265-273, doi:10.1016/j.jalz.2010.03.013 (2010).
- 34 Morris, J. C. et al. The Uniform Data Set (UDS): clinical and cognitive variables and descriptive data from Alzheimer Disease Centers. *Alzheimer Dis Assoc Disord* 20, 210-216, doi:10.1097/01.wad.0000213865.09806.92 (2006).
- 35 Morris, J. C. The Clinical Dementia Rating (CDR): current version and scoring rules. *Neurology* 43, 2412-2414 (1993).
- 36 Berg, L. et al. Mild senile dementia of the Alzheimer type: 2. Longitudinal assessment. *Ann Neurol* 23, 477-484, doi:10.1002/ana.410230509 (1988).

\*ADNI is funded by the National Institute on Aging, the National Institute of Biomedical Imaging and Bioengineering, and through generous contributions from the following: AbbVie, Alzheimer's Association;

Alzheimer's Drug Discovery Foundation; Araclon Biotech; BioClinica, Inc.; Biogen; Bristol-Myers Squibb Company; CereSpir, Inc.; Cogstate; Eisai Inc.; Elan Pharmaceuticals, Inc.; Eli

Lilly and Company; EuroImmun; F. Hoffmann-La Roche Ltd and its affiliated company Genentech, Inc.; Fujirebio; GE Healthcare; IXICO Ltd.; Janssen Alzheimer Immunotherapy Research & Development, LLC.; Johnson & Johnson Pharmaceutical Research & Development LLC.; Lumosity; Lundbeck; Merck & Co., Inc.; Meso Scale Diagnostics, LLC.; NeuroRx Research; Neurotrack Technologies; Novartis Pharmaceuticals Corporation; Pfizer Inc.; Piramal Imaging; Servier; Takeda Pharmaceutical Company; and Transition Therapeutics. The Canadian Institutes of Health Research is providing funds to support ADNI clinical sites in Canada. Private sector contributions are facilitated by the Foundation for the National Institutes of Health ([www.fnih.org](http://www.fnih.org)). The grantee organization is the Northern California Institute for Research and Education, and the study is coordinated by the Alzheimer's Therapeutic Research Institute at the University of Southern California. ADNI data are disseminated by the Laboratory for Neuro Imaging at the University of Southern California.

## ACKNOWLEDGEMENT LIST FOR ADNI PUBLICATIONS

The Data and Publications Committee, in keeping with the publication policies adopted by the ADNI Steering Committee, here provide lists for standardized acknowledgement. The list consists of two parts: I. ADNI Infrastructure Investigators and Site Investigators and II. DOD ADNI Infrastructure Investigators and Site Investigators. Infrastructure Investigators represent the names responsible for leadership and infrastructure. Site Investigators represent the names of individuals at each recruiting site. All papers, including methodological papers, should have an acknowledgement list that consists of Infrastructure Investigators plus the FULL list.

### I. ADNI I, GO and II

#### Part A: Leadership and Infrastructure

##### **Principal Investigator**

Michael W. Weiner, MD UC San Francisco

##### **ADCS PI and Director of Coordinating Center Clinical Core**

Paul Aisen, MD University of Southern California

##### **Executive Committee**

|                             |                                                     |
|-----------------------------|-----------------------------------------------------|
| Michael Weiner, MD          | UC San Francisco                                    |
| Paul Aisen, MD              | University of Southern California                   |
| Ronald Petersen, MD, PhD    | Mayo Clinic, Rochester                              |
| Clifford R. Jack, Jr., MD   | Mayo Clinic, Rochester                              |
| William Jagust, MD          | UC Berkeley                                         |
| John Q. Trojanowki, MD, PhD | U Pennsylvania                                      |
| Arthur W. Toga, PhD         | USC                                                 |
| Laurel Beckett, PhD         | UC Davis                                            |
| Robert C. Green, MD, MPH    | Brigham and Women's Hospital/Harvard Medical School |
| Andrew J. Saykin, PsyD      | Indiana University                                  |
| John Morris, MD             | Washington University St. Louis                     |
| Leslie M. Shaw              | University of Pennsylvania                          |

##### **ADNI External Advisory Board (ESAB)**

|                         |                                                           |
|-------------------------|-----------------------------------------------------------|
| Zaven Khachaturian, PhD | Prevent Alzheimer's Disease 2020 (Chair)                  |
| Greg Sorensen, MD       | Siemens                                                   |
| Maria Carrillo, PhD     | Alzheimer's Association                                   |
| Lew Kuller, MD          | University of Pittsburgh                                  |
| Marc Raichle, MD        | Washington University St. Louis                           |
| Steven Paul, MD         | Cornell University                                        |
| Peter Davies, MD        | Albert Einstein College of Medicine of Yeshiva University |
| Howard Fillit, MD       | AD Drug Discovery Foundation                              |
| Franz Hefti, PhD        | Acumen Pharmaceuticals                                    |
| David Holtzman, MD      | Washington University St. Louis                           |
| M. Marcel Mesulam, MD   | Northwestern University                                   |
| William Potter, MD      | National Institute of Mental Health                       |
| Peter Snyder, PhD       | Brown University                                          |

##### **ADNI 2 Private Partner Scientific Board (PPSB)**

Adam Schwartz, MD Eli Lilly (Chair)

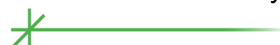



### **Neuropathology Core Leaders**

|                                                             |                                 |
|-------------------------------------------------------------|---------------------------------|
| John C. Morris, MD                                          | Washington University St. Louis |
| Nigel J. Cairns, PhD, FRCPath                               | Washington University St. Louis |
| Erin Franklin, MS, CCRP                                     | Washington University St. Louis |
| Lisa Taylor-Reinwald, BA, HTL<br>(ASCP) – Past Investigator | Washington University St. Louis |

### **Biomarkers Core Leaders and Key Personnel**

|                             |                          |
|-----------------------------|--------------------------|
| Leslie M. Shaw, PhD         | UPenn School of Medicine |
| John Q. Trojanowki, MD, PhD | UPenn School of Medicine |
| Virginia Lee, PhD, MBA      | UPenn School of Medicine |
| Magdalena Korecka, PhD      | UPenn School of Medicine |
| Michal Figurski, PhD        | UPenn School of Medicine |

### **Informatics Core Leaders and Key Personnel**

|                     |               |
|---------------------|---------------|
| Arthur W. Toga, PhD | USC (Core PI) |
| Karen Crawford      | USC           |
| Scott Neu, PhD      | USC           |

### **Genetics Core Leaders and Key Personnel**

|                        |                    |
|------------------------|--------------------|
| Andrew J. Saykin, PsyD | Indiana University |
| Tatiana M. Foroud, PhD | Indiana University |
| Steven Potkin, MD UC   | UC Irvine          |
| Li Shen, PhD           | Indiana University |
| Kelley Faber, MS, CCRC | Indiana University |
| Sungeun Kim, PhD       | Indiana University |
| Kwangsik Nho, PhD      | Indiana University |

### **Initial Concept Planning & Development**

|                         |                                  |
|-------------------------|----------------------------------|
| Michael W. Weiner, MD   | UC San Francisco                 |
| Lean Thal, MD           | UC San Diego                     |
| Zaven Khachaturian, PhD | Prevent Alzheimer's Disease 2020 |

### **Early Project Proposal Development**

|                         |                                     |
|-------------------------|-------------------------------------|
| Leon Thal, MD           | UC San Diego                        |
| Neil Buckholtz          | National Institute on Aging         |
| Michael W. Weiner, MD   | UC San Francisco                    |
| Peter J. Snyder, PhD    | Brown University                    |
| William Potter, MD      | National Institute of Mental Health |
| Steven Paul, MD         | Cornell University                  |
| Marilyn Albert, PhD     | Johns Hopkins University            |
| Richard Frank, MD, PhD  | Richard Frank Consulting            |
| Zaven Khachaturian, PhD | Prevent Alzheimer's Disease 2020    |

### **NIA**

|                |                             |
|----------------|-----------------------------|
| John Hsiao, MD | National Institute on Aging |
|----------------|-----------------------------|



## **Part B: Investigators By Site**

### **Oregon Health & Science University:**

Jeffrey Kaye, MD  
Joseph Quinn, MD  
Lisa Silbert, MD  
Betty Lind, BS  
Raina Carter, BA – Past Investigator  
Sara Dolen, BS – Past Investigator

### **University of Southern California:**

Lon S. Schneider, MD  
Sonia Pawluczyk, MD  
Mauricio Becerra, BS  
Liberty Teodoro, RN  
Bryan M. Spann, DO, PhD – Past Investigator

### **University of California – San Diego:**

James Brewer, MD, PhD  
Helen Vanderswag, RN  
Adam Fleisher, MD – Past Investigator

### **University of Michigan:**

Judith L. Heidebrink, MD, MS  
Joanne L. Lord, LPN, BA, CCRC – Past Investigator

### **Mayo Clinic, Rochester:**

Ronald Petersen, MD, PhD  
Sara S. Mason, RN  
Colleen S. Albers, RN  
David Knopman, MD  
Kris Johnson, RN – Past Investigator

### **Baylor College of Medicine:**

Rachelle S. Doody, MD, PhD  
Javier Villanueva-Meyer, MD  
Valory Pavlik, PhD  
Victoria Shibley, MS  
Munir Chowdhury, MBBS, MS – Past Investigator  
Susan Rountree, MD – Past Investigator  
Mimi Dang, MD – Past Investigator

### **Columbia University Medical Center:**

Yaakov Stern, PhD  
Lawrence S. Honig, MD, PhD  
Karen L. Bell, MD

### **Washington University, St. Louis:**

Beau Ances, MD  
John C. Morris, MD  
Maria Carroll, RN, MSN  
Mary L. Creech, RN, MSW  
Erin Franklin, MS, CCRP  
Mark A. Mintun, MD – Past Investigator  
Stacy Schneider, APRN, BC, GNP – Past Investigator  
Angela Oliver, RN, BSN, MSG – Past Investigator

### **University of Alabama - Birmingham:**

Daniel Marson, JD, PhD  
David Geldmacher, MD  
Marissa Natelson Love, MD  
Randall Griffith, PhD, ABPP – Past Investigator  
David Clark, MD – Past Investigator  
John Brockington, MD – Past Investigator  
Erik Roberson, MD – Past Investigator

### **Mount Sinai School of Medicine:**

Hillel Grossman, MD  
Effie Mitsis, PhD

### **Rush University Medical Center:**

Raj C. Shah, MD  
Leyla deToledo-Morrell, PhD – Past Investigator

### **Wien Center:**

Ranjan Duara, MD  
Maria T. Greig-Custo, MD  
Warren Barker, MA, MS

### **Johns Hopkins University:**

Marilyn Albert, PhD  
Chiadi Onyike, MD  
Daniel D'Agostino II, BS  
Stephanie Kielb, BS – Past Investigator

### **New York University:**

Martin Sadowski, MD, PhD  
Mohammed O. Sheikh, MD  
Anasztasia Ulysse  
Mrunalini Gaikwad

### **Duke University Medical Center:**

P. Murali Doraiswamy, MBBS, FRCP  
Jeffrey R. Petrella, MD



Salvador Borges-Neto, MD  
Terence Z. Wong, MD – Past Investigator  
Edward Coleman – Past Investigator

**University of Pennsylvania:**

Steven E. Arnold, MD  
Jason H. Karlawish, MD  
David A. Wolk, MD  
Christopher M. Clark, MD

**University of Kentucky:**

Charles D. Smith, MD  
Greg Jicha, MD  
Peter Hardy, PhD  
Partha Sinha, PhD  
Elizabeth Oates, MD  
Gary Conrad, MD

**University of Pittsburgh:**

Oscar L. Lopez, MD  
MaryAnn Oakley, MA  
Donna M. Simpson, CRNP, MPH

**University of Rochester Medical Center:**

Anton P. Porsteinsson, MD  
Bonnie S. Goldstein, MS, NP  
Kim Martin, RN  
Kelly M. Makino, BS – Past Investigator  
M. Saleem Ismail, MD – Past Investigator  
Connie Brand, RN – Past Investigator

**University of California, Irvine:**

Steven G. Potkin, MD  
Adrian Preda, MD  
Dana Nguyen, PhD

**University of Texas Southwestern Medical School:**

Kyle Womack, MD  
Dana Mathews, MD, PhD  
Mary Quiceno, MD

**Emory University:**

Allan I. Levey, MD, PhD  
James J. Lah, MD, PhD  
Janet S. Cellar, DNP, PMHCNS-BC

**University of Kansas, Medical Center:**

Jeffrey M. Burns, MD  
Russell H. Swerdlow, MD

William M. Brooks, PhD

**University of California, Los Angeles:**

Liana Apostolova, MD  
Kathleen Tingus, PhD  
Ellen Woo, PhD  
Daniel H.S. Silverman, MD, PhD  
Po H. Lu, PsyD – Past Investigator  
George Bartzokis, MD – Past Investigator

**Mayo Clinic, Jacksonville:**

Neill R Graff-Radford, MBBCH, FRCP (London)  
Francine Parfitt, MSH, CCRC  
Kim Poki-Walker, BA

**Indiana University:**

Martin R. Farlow, MD  
Ann Marie Hake, MD  
Brandy R. Matthews, MD – Past Investigator  
Jared R. Brosch, MD  
Scott Herring, RN, CCRC

**Yale University School of Medicine:**

Christopher H. van Dyck, MD  
Richard E. Carson, PhD  
Martha G. MacAvoy, PhD  
Pradeep Varma, MD

**McGill Univ., Montreal-Jewish General Hospital:**

Howard Chertkow, MD  
Howard Bergman, MD  
Chris Hosein, MEd

**Sunnybrook Health Sciences, Ontario:**

Sandra Black, MD, FRCPC  
Bojana Stefanovic, PhD  
Curtis Caldwell, PhD

**U.B.C. Clinic for AD & Related Disorders:**

Ging-Yuek Robin Hsiung, MD, MHSc, FRCPC  
Benita Mudge, BS  
Vesna Sossi, PhD  
Howard Feldman, MD, FRCPC – Past Investigator  
Michele Assaly, MA – Past Investigator

**Cognitive Neurology - St. Joseph's, Ontario:**

Elizabeth Finger, MD  
Stephen Pasternack, MD, PhD  
Irina Rachisky, MD  
Dick Trost, PhD – Past Investigator





Andrew Kertesz, MD – Past Investigator

**Cleveland Clinic Lou Ruvo Center for Brain Health:**

Charles Bernick, MD, MPH  
Donna Munic, PhD

**Northwestern University:**

Marek-Marsel Mesulam, MD  
Emily Rogalski, PhD  
Kristine Lipowski, MA  
Sandra Weintraub, PhD  
Borna Bonakdarpour, MD  
Diana Kerwin, MD – Past Investigator  
Chuang-Kuo Wu, MD, PhD – Past Investigator  
Nancy Johnson, PhD – Past Investigator

**Premiere Research Inst (Palm Beach Neurology):**

Carl Sadowsky, MD  
Teresa Villena, MD

**Georgetown University Medical Center:**

Raymond Scott Turner, MD, PhD  
Kathleen Johnson, NP  
Brigid Reynolds, NP

**Brigham and Women's Hospital:**

Reisa A. Sperling, MD  
Keith A. Johnson, MD  
Gad Marshall, MD

**Stanford University:**

Jerome Yesavage, MD  
Joy L. Taylor, PhD  
Barton Lane, MD  
Allyson Rosen, PhD – Past Investigator  
Jared Tinklenberg, MD – Past Investigator

**Banner Sun Health Research Institute:**

Marwan N. Sabbagh, MD  
Christine M. Belden, PsyD  
Sandra A. Jacobson, MD  
Sherye A. Sirrel, CCRC

**Boston University:**

Neil Kowall, MD  
Ronald Killiany, PhD  
Andrew E. Budson, MD  
Alexander Norbash, MD – Past Investigator

Patricia Lynn Johnson, BA – Past Investigator

**Howard University:**

Thomas O. Obisesan, MD, MPH  
Saba Wolday, MSc  
Joanne Allard, PhD

**Case Western Reserve University:**

Alan Lerner, MD  
Paula Ogrocki, PhD  
Curtis Tatsuoka, PhD  
Parianne Fatica, BA, CCRC

**University of California, Davis – Sacramento:**

Evan Fletcher, PhD  
Pauline Maillard, PhD  
John Olichney, MD  
Charles DeCarli, MD – Past Investigator  
Owen Carmichael, PhD – Past Investigator

**Neurological Care of CNY:**

Smita Kittur, MD – Past Investigator

**Parkwood Hospital:**

Michael Borrie, MB ChB  
T-Y Lee, PhD  
Dr Rob Bartha, PhD

**University of Wisconsin:**

Sterling Johnson, PhD  
Sanjay Asthana, MD  
Cynthia M. Carlsson, MD, MS

**University of California, Irvine - BIC:**

Steven G. Potkin, MD  
Adrian Preda, MD  
Dana Nguyen, PhD

**Banner Alzheimer's Institute:**

Pierre Tariot, MD  
Anna Burke, MD  
Ann Marie Milliken, NMD  
Nadira Trncic, MD, PhD, CCRC – Past Investigator  
Adam Fleisher, MD – Past Investigator  
Stephanie Reeder, BA – Past Investigator

**Dent Neurologic Institute:**

Vernice Bates, MD  
Horacio Capote, MD  
Michelle Rainka, PharmD, CCRP



**Ohio State University:**

Douglas W. Scharre, MD  
Maria Kataki, MD, PhD  
Brendan Kelley, MD

**Albany Medical College:**

Earl A. Zimmerman, MD  
Dzintra Celmins, MD  
Alice D. Brown, FNP

**Hartford Hospital, Olin Neuropsychiatry  
Research Center:**

Godfrey D. Pearlson, MD  
Karen Blank, MD  
Karen Anderson, RN

**Dartmouth-Hitchcock Medical Center:**

Laura A. Flashman, PhD  
Marc Seltzer, MD  
Mary L. Hynes, RN, MPH  
Robert B. Santulli, MD – Past Investigator

**Wake Forest University Health Sciences:**

Kaycee M. Sink, MD, MAS  
Leslie Gordineer  
Jeff D. Williamson, MD, MHS – Past Investigator  
Pradeep Garg, PhD – Past Investigator  
Franklin Watkins, MD – Past Investigator

**Rhode Island Hospital:**

Brian R. Ott, MD  
Geoffrey Tremont, PhD  
Lori A. Daiello, Pharm.D, ScM

**Butler Hospital:**

Stephen Salloway, MD, MS  
Paul Malloy, PhD  
Stephen Correia, PhD

**UC San Francisco:**

Howard J. Rosen, MD  
Bruce L. Miller, MD  
David Perry, MD

**Medical University South Carolina:**

Jacobo Mintzer, MD, MBA  
Kenneth Spicer, MD, PhD  
David Bachman, MD

**St. Joseph's Health Care:**

Elizabeth Finger, MD  
Stephen Pasternak, MD  
Irina Rachinsky, MD  
John Rogers, MD  
Andrew Kertesz, MD – Past Investigator  
Dick Drost, MD – Past Investigator

**Nathan Kline Institute**

Nunzio Pomara, MD  
Raymundo Hernando, MD  
Antero Sarrael, MD

**University of Iowa College of Medicine**

Susan K. Schultz, MD  
Karen Ekstam Smith, RN  
Hristina Koleva, MD  
Ki Won Nam, MD  
Hyungsub Shim, MD– Past Investigator

**Cornell University**

Norman Relkin, MD, PhD  
Gloria Chiang, MD  
Michael Lin, MD  
Lisa Ravdin, PhD

**University of South Florida: USF Health Byrd  
Alzheimer's Institute**

Amanda Smith, MD  
Balebail Ashok Raj, MD  
Kristin Fargher, MD– Past Investigator





**San Francisco Veterans Affairs Medical Center**

|                   |                  |
|-------------------|------------------|
| Thomas Neylan, MD | UC San Francisco |
| Jacqueline Hayes  | UC San Francisco |
| Shannon Finley    | UC San Francisco |

**Biostatistics Core Leaders and Key Personnel**

|                      |                    |
|----------------------|--------------------|
| Danielle Harvey, PhD | UC Davis (Core PI) |
| Michael Donohue, PhD | UC San Diego       |

**MRI Core Leaders and Key Personnel**

|                           |                                  |
|---------------------------|----------------------------------|
| Clifford R. Jack, Jr., MD | Mayo Clinic, Rochester (Core PI) |
| Matthew Bernstein, PhD    | Mayo Clinic, Rochester           |
| Bret Borowski, RT         | Mayo Clinic                      |
| Jeff Gunter, PhD          | Mayo Clinic                      |
| Matt Senjem, MS           | Mayo Clinic                      |
| Kejal Kantarci            | Mayo Clinic                      |
| Chad Ward                 | Mayo Clinic                      |

**PET Core Leaders and Key Personnel**

|                       |                              |
|-----------------------|------------------------------|
| William Jagust, MD    | UC Berkeley (Core PI)        |
| Robert A. Koeppe, PhD | University of Michigan       |
| Norm Foster, MD       | University of Utah           |
| Eric M. Reiman, MD    | Banner Alzheimer's Institute |
| Kewei Chen, PhD       | Banner Alzheimer's Institute |
| Susan Landau, PhD     | UC Berkeley                  |

**Neuropathology Core Leaders**

|                               |                                 |
|-------------------------------|---------------------------------|
| John C. Morris, MD            | Washington University St. Louis |
| Nigel J. Cairns, PhD, FRCPath | Washington University St. Louis |
| Erin Householder, MS          | Washington University St. Louis |

**Biomarkers Core Leaders and Key Personnel**

|                             |                                    |
|-----------------------------|------------------------------------|
| Leslie M. Shaw, PhD         | Perelman School of Medicine, UPenn |
| John Q. Trojanowki, MD, PhD | Perelman School of Medicine, UPenn |
| Virginia Lee, PhD, MBA      | Perelman School of Medicine, UPenn |
| Magdalena Korecka, PhD      | Perelman School of Medicine, UPenn |
| Michal Figurski, PhD        | Perelman School of Medicine, UPenn |

**Informatics Core Leaders and Key Personnel**

|                     |               |
|---------------------|---------------|
| Arthur W. Toga, PhD | USC (Core PI) |
| Karen Crawford      | USC           |
| Scott Neu, PhD      | USC           |

**Genetics Core Leaders and Key Personnel**

|                        |                    |
|------------------------|--------------------|
| Andrew J. Saykin, PsyD | Indiana University |
| Tatiana M. Foroud, PhD | Indiana University |
| Steven Potkin, MD UC   | UC Irvine          |
| Li Shen, PhD           | Indiana University |
| Kelley Faber, MS, CCRC | Indiana University |
| Sungeun Kim, PhD       | Indiana University |



University

**Initial Concept Planning & Development**

Michael W. Weiner, MD

UC San Francisco

Karl Friedl

Department of Defense (retired)

**Part B: Investigators By Site**

**University of Southern California:**

Lon S. Schneider, MD, MS

Sonia Pawluczyk, MD

Mauricio Becerra

**University of California, San Diego:**

James Brewer, MD, PhD

Helen Vanderswag, RN

**Columbia University Medical Center:**

Yaakov Stern, PhD

Lawrence S. Honig, MD, PhD

Karen L. Bell, MD

**Rush University Medical Center:**

Debra Fleischman, Ph.D.

Konstantinos Arfanakis, Ph.D.

Raj C. Shah, M.D.

**Wien Center:**

Dr. Ranjan Duara MD PI

Dr. Daniel Varon MD Co-PI

Maria T Greig HP Coordinator

**Duke University Medical Center:**

P. Murali Doraiswamy, MBBS

Jeffrey R. Petrella, MD

Olga James, MD

**University of Rochester Medical Center:**

Anton P. Porsteinsson, MD (director)

Bonnie Goldstein, MS, NP (coordinator)

Kimberly S. Martin, RN

**University of California, Irvine:**

Steven G. Potkin, MD

Adrian Preda, MD

Dana Nguyen, PhD

**Medical University South Carolina:**

Jacobo Mintzer, MD, MBA

Dino Massoglia, MD, PhD

Olga Brawman-Mintzer, MD



**Premiere Research Inst (Palm Beach Neurology):**

Carl Sadowsky, MD  
Walter Martinez, MD  
Teresa Villena, MD

**University of California, San Francisco:**

William Jagust MD  
Susan Landau PhD  
Howard Rosen, MD  
David Perry

**Georgetown University Medical Center:**

Raymond Scott Turner, MD, PhD  
Kelly Behan  
Brigid Reynolds, NP

**Brigham and Women's Hospital:**

Reisa A. Sperling, MD  
Keith A. Johnson, MD  
Gad Marshall, MD

**Banner Sun Health Research Institute:**

Marwan N. Sabbagh, MD  
Sandra A. Jacobson, MD  
Sherye A. Sirrel, MS, CCRC

**Howard University:**

Thomas O. Obisesan, MD, MPH  
Saba Wolday, MSc  
Joanne Allard, PhD

**University of Wisconsin:**

Sterling C. Johnson, Ph.D.  
J. Jay Fruehling, M.A.  
Sandra Harding, M.S.

**University of Washington:**

Elaine R. Peskind, MD  
Eric C. Petrie, MD, MS  
Gail Li, MD, PhD

**Stanford University:**

Jerome A. Yesavage, MD  
Joy L. Taylor, PhD  
Ansgar J. Furst, PhD  
Steven Chao, M.D.

**Cornell University:**

Norman Relkin, MD, PhD  
Gloria Chiang, MD



Supplement: NIHMS910420-supplement-Supplementary_information.pdf [file NIHMS910420-supplement-Supplementary_information.pdf]
