# Supplementary material
Source: PubMed Central journal article supplement (PMC5641217)
Supplement: NIHMS910420-supplement-Supplemental_Table.pdf [file NIHMS910420-supplement-Supplemental_Table.pdf]

Supplementary table for Fig. 3 - Gene list

| Gene          | Cluster1 genes        |                           |                       |                           |                      |                          |
|---------------|-----------------------|---------------------------|-----------------------|---------------------------|----------------------|--------------------------|
|               | p-value(TE4 vs. TEKO) | Fold-Change(TE4 vs. TEKO) | p-value(TE3 vs. TEKO) | Fold-Change(TE3 vs. TEKO) | p-value(TE4 vs. TE3) | Fold-Change(TE4 vs. TE3) |
| C3            | 0.000286734           | 8.87861                   | 0.00592385            | 4.43441                   | 0.156134             | 2.00221                  |
| Igax          | 3.79E-05              | 7.08751                   | 0.000134588           | 5.63713                   | 0.511113             | 1.25729                  |
| Clec7a        | 6.66E-05              | 5.8658                    | 0.000364576           | 4.41143                   | 0.393615             | 1.32968                  |
| Spp1          | 0.000272894           | 5.84727                   | 0.00124633            | 4.40528                   | 0.460726             | 1.32733                  |
| Tr            | 0.104693              | 5.36415                   | 0.0206483             | 12.3745                   | 0.40363              | -2.30689                 |
| Tgml          | 0.00367816            | 5.10348                   | 0.0108688             | 3.96883                   | 0.603849             | 1.28589                  |
| Lilrb4        | 0.000832977           | 5.01903                   | 0.00106445            | 4.78918                   | 0.905322             | 1.04799                  |
| Ccl2          | 0.00257726            | 4.61509                   | 0.00399253            | 4.2162                    | 0.83394              | 1.09461                  |
| Cybb          | 0.000275197           | 4.46835                   | 0.000316738           | 4.3685                    | 0.94417              | 1.02286                  |
| MS4A7         | 2.59E-05              | 4.44211                   | 0.0041743             | 2.32408                   | 0.0204299            | 1.91134                  |
| Apoc1         | 0.000811979           | 4.21111                   | 0.0174726             | 2.50774                   | 0.152978             | 1.67925                  |
| Igf2          | 7.97E-05              | 3.98836                   | 0.000926295           | 2.8897                    | 0.231093             | 1.3802                   |
| CXCL10        | 0.00555341            | 3.97524                   | 0.00606797            | 3.90253                   | 0.966056             | 1.01863                  |
| Olfrl110      | 0.000351799           | 3.80224                   | 0.00160548            | 3.05474                   | 0.463241             | 1.2447                   |
| LY9           | 0.00037548            | 3.54465                   | 0.0129203             | 2.18717                   | 0.102334             | 1.62066                  |
| Tr2           | 0.000955715           | 3.48322                   | 0.00171532            | 3.19132                   | 0.777889             | 1.09147                  |
| CLEC4D        | 0.0101842             | 3.37793                   | 0.0579011             | 2.34158                   | 0.390463             | 1.44258                  |
| HPSE          | 0.000891077           | 3.36609                   | 0.698905              | 1.12287                   | 0.00198973           | 2.99775                  |
| LGALS3BP      | 0.000530733           | 3.33803                   | 0.00058075            | 3.29711                   | 0.964781             | 1.01241                  |
| Cd2004        | 0.00750111            | 3.30819                   | 0.278491              | 1.54601                   | 0.0684163            | 2.13982                  |
| OAS2          | 0.0124411             | 3.14602                   | 0.0130469             | 3.11628                   | 0.98154              | 1.00954                  |
| Pon3          | 0.00247677            | 3.10836                   | 0.00421061            | 2.86696                   | 0.799419             | 1.0842                   |
| C4a           | 3.12E-05              | 3.0196                    | 0.000531233           | 2.28602                   | 0.160502             | 1.3209                   |
| Trem2         | 0.00267654            | 2.99493                   | 0.0681331             | 1.82302                   | 0.124984             | 1.64284                  |
| Gpmb          | 0.0128005             | 2.99001                   | 0.0856283             | 2.04101                   | 0.340343             | 1.46497                  |
| 5430435G22Rik | 5.15E-05              | 2.98959                   | 0.000522691           | 2.36507                   | 0.250165             | 1.26406                  |
| Abca1         | 2.22E-05              | 2.97509                   | 0.00454832            | 1.82298                   | 0.0158727            | 1.63199                  |
| CD68          | 0.000170768           | 2.87562                   | 0.00518484            | 2.00542                   | 0.11115              | 1.43392                  |
| Ccl3          | 0.000103567           | 2.8627                    | 0.000220048           | 2.64661                   | 0.702309             | 1.08165                  |
| Enpp2         | 0.0842125             | 2.85126                   | 0.0236686             | 4.16356                   | 0.514121             | -1.46025                 |
| BMP4          | 1.86E-05              | 2.78526                   | 0.000312586           | 2.17103                   | 0.155572             | 1.28292                  |
| Icam1         | 0.000908181           | 2.76822                   | 0.0300311             | 1.808                     | 0.105288             | 1.5311                   |
| CAPG          | 0.000454088           | 2.7649                    | 0.000637332           | 2.66041                   | 0.867953             | 1.03928                  |
| BMP7          | 7.71E-05              | 2.74408                   | 0.00220416            | 1.9977                    | 0.11157              | 1.37362                  |
| Lag3          | 0.00221503            | 2.72376                   | 0.0165077             | 2.08377                   | 0.340509             | 1.30713                  |
| BMP6          | 5.93E-05              | 2.71812                   | 0.000694758           | 2.16186                   | 0.225842             | 1.25731                  |
| Fam46c        | 0.000313953           | 2.6995                    | 0.00163827            | 2.26582                   | 0.424984             | 1.1914                   |
| Atf3          | 0.000105774           | 2.67215                   | 0.00215025            | 2.00888                   | 0.151254             | 1.33017                  |
| CTSH          | 0.000118221           | 2.63957                   | 0.00378778            | 1.90527                   | 0.104106             | 1.3854                   |
| C1qa          | 0.00114775            | 2.63877                   | 0.00762914            | 2.10879                   | 0.369423             | 1.25132                  |
| Cxcl16        | 0.000217873           | 2.62149                   | 0.000426808           | 2.44959                   | 0.738314             | 1.07018                  |
| C1qb          | 0.000721717           | 2.62148                   | 0.00752679            | 2.01876                   | 0.269039             | 1.29856                  |
| Msr1          | 0.00363131            | 2.6206                    | 0.0202598             | 2.06808                   | 0.410868             | 1.26717                  |
| C3ar1         | 0.000205102           | 2.61474                   | 0.0014568             | 2.15499                   | 0.343003             | 1.21334                  |
| FGR           | 0.000265245           | 2.5666                    | 0.000846107           | 2.28645                   | 0.570047             | 1.12252                  |
| Chi3l1        | 0.004955              | 2.51955                   | 0.0406567             | 1.8759                    | 0.310167             | 1.34311                  |
| Ccl6          | 0.000303617           | 2.5047                    | 9.44E-05              | 2.81942                   | 0.556369             | -1.12565                 |
| CD63          | 1.75E-05              | 2.46864                   | 0.000311009           | 1.97484                   | 0.147616             | 1.25005                  |
| Tr1           | 0.000706699           | 2.43644                   | 0.00496483            | 1.99409                   | 0.354769             | 1.22183                  |
| C1qc          | 0.00107925            | 2.41231                   | 0.0095482             | 1.91174                   | 0.303392             | 1.26184                  |
| Ccl4          | 0.00228675            | 2.40411                   | 0.00982673            | 2.02761                   | 0.48733              | 1.18569                  |
| Ptgd3         | 0.00214004            | 2.40119                   | 0.0282601             | 1.77668                   | 0.222655             | 1.3515                   |
| Sle4a2        | 0.0150478             | 2.39834                   | 0.0143909             | 2.41536                   | 0.982595             | -1.0071                  |
| Dab2          | 0.000363547           | 2.38127                   | 0.0156353             | 1.67653                   | 0.0839727            | 1.42036                  |
| Fcrls         | 0.000110228           | 2.37674                   | 0.0229525             | 1.52607                   | 0.0180102            | 1.55743                  |
| A430107D22Rik | 4.60E-05              | 2.37189                   | 0.000224063           | 2.08938                   | 0.419621             | 1.13521                  |
| Spint1        | 0.00214942            | 2.36756                   | 0.00332571            | 2.25296                   | 0.834305             | 1.05086                  |
| Ctsd          | 0.000383067           | 2.36305                   | 0.00364866            | 1.91567                   | 0.284252             | 1.23354                  |
| GPR65         | 0.00162424            | 2.35631                   | 0.00466854            | 2.10005                   | 0.613988             | 1.12202                  |
| Dap12         | 0.000740309           | 2.30587                   | 0.00334235            | 1.99213                   | 0.471325             | 1.15749                  |
| Socs3         | 0.0389851             | 2.29325                   | 0.0732809             | 2.02727                   | 0.741547             | 1.1312                   |
| IRF8          | 0.000244689           | 2.27791                   | 0.00140576            | 1.9602                    | 0.397147             | 1.16208                  |
| CD206         | 0.00072299            | 2.24849                   | 0.133948              | 1.35429                   | 0.0182408            | 1.66027                  |
| Mmp2          | 5.87E-05              | 2.24404                   | 0.000284317           | 1.99                      | 0.424653             | 1.12766                  |
| Fer1l3        | 0.000186548           | 2.23522                   | 0.00671865            | 1.67209                   | 0.0963672            | 1.33678                  |
| B2M           | 0.00335582            | 2.23514                   | 0.00563783            | 2.10823                   | 0.803741             | 1.0602                   |
| CTSZ          | 0.000391842           | 2.21959                   | 0.00293068            | 1.8645                    | 0.336761             | 1.19044                  |
| Ctss          | 0.00166101            | 2.21932                   | 0.00958824            | 1.85648                   | 0.405335             | 1.19545                  |
| Fcgr1         | 0.0066961             | 2.21054                   | 0.0158542             | 1.98586                   | 0.677048             | 1.11314                  |
| Il21r         | 0.000873532           | 2.17075                   | 0.0426993             | 1.51382                   | 0.0734055            | 1.43396                  |
| CYBA          | 0.00026293            | 2.13956                   | 0.00437734            | 1.71198                   | 0.184954             | 1.24976                  |
| Gpx3          | 0.001159              | 2.13576                   | 0.0262362             | 1.59629                   | 0.145664             | 1.33796                  |
| Cd86          | 0.00174124            | 2.12767                   | 0.0192936             | 1.68304                   | 0.256365             | 1.26418                  |
| Apod          | 0.000556001           | 2.11736                   | 0.00563578            | 1.74172                   | 0.273783             | 1.21567                  |
| Tgfb2         | 6.33E-05              | 2.11617                   | 0.00129526            | 1.71543                   | 0.145626             | 1.23361                  |
| Ltca4s        | 0.00958434            | 2.09123                   | 0.0311035             | 1.80634                   | 0.564563             | 1.15772                  |
| Igf1          | 0.0017452             | 2.08545                   | 0.0452845             | 1.52565                   | 0.126973             | 1.36693                  |
| CD69          | 0.0325795             | 2.08285                   | 0.00179638            | 3.25284                   | 0.173041             | -1.56172                 |
| Hmox1         | 0.000158387           | 2.07054                   | 0.000827397           | 1.83393                   | 0.417555             | 1.12902                  |
| Tspo          | 0.000332244           | 2.06361                   | 0.000122374           | 2.23596                   | 0.61629              | -1.08352                 |
| Tmem86a       | 0.000499745           | 2.06351                   | 0.0146472             | 1.572                     | 0.11791              | 1.31267                  |
| Siglec1       | 0.00415166            | 2.06173                   | 0.0538755             | 1.56554                   | 0.218332             | 1.31694                  |
| CDKN1A        | 0.00243239            | 2.04158                   | 0.00259913            | 2.02866                   | 0.974628             | 1.00637                  |
| SLAMF1        | 0.0171849             | 2.02499                   | 0.264456              | 1.35715                   | 0.149519             | 1.49209                  |

|               |             |         |             |          |             |          |
|---------------|-------------|---------|-------------|----------|-------------|----------|
| Tlr7          | 0.00184507  | 2.02436 | 0.00391615  | 1.89009  | 0.718684    | 1.07104  |
| RSAD2         | 0.0551406   | 2.02434 | 0.0307538   | 2.24481  | 0.764693    | -1.10891 |
| Pycard        | 0.000679551 | 2.02404 | 0.528389    | 1.11264  | 0.00252862  | 1.81913  |
| CD9           | 0.000365846 | 2.01809 | 0.00135326  | 1.82661  | 0.525971    | 1.10482  |
| Csf3r         | 0.00737637  | 2.01609 | 0.0521987   | 1.61211  | 0.339101    | 1.25059  |
| Kl            | 0.195574    | 1.96842 | 0.0391893   | 3.09386  | 0.380021    | -1.57174 |
| NFKB2         | 0.00200614  | 1.95959 | 0.0110475   | 1.68611  | 0.417529    | 1.16219  |
| Ebf3          | 0.0128057   | 1.95857 | 0.0120304   | 1.97302  | 0.975766    | -1.00738 |
| Ccl5          | 0.118813    | 1.95163 | 0.0318324   | 2.60262  | 0.487268    | -1.33356 |
| LAPTM5        | 0.00206176  | 1.9396  | 0.0200673   | 1.5895   | 0.28149     | 1.22026  |
| Cd14          | 3.09E-05    | 1.93908 | 0.000261986 | 1.70769  | 0.277848    | 1.13549  |
| Adap2         | 0.000133224 | 1.93527 | 0.00241059  | 1.60388  | 0.168251    | 1.20662  |
| LGALS1        | 1.06E-05    | 1.93147 | 0.000297241 | 1.60956  | 0.0933221   | 1.2      |
| Gusb          | 0.000337011 | 1.92832 | 0.00870158  | 1.53576  | 0.130524    | 1.25561  |
| P2ry6         | 0.000647989 | 1.90704 | 0.0019214   | 1.75945  | 0.600488    | 1.08389  |
| CD300LB       | 0.00734678  | 1.90111 | 0.0206673   | 1.70959  | 0.616077    | 1.11202  |
| Axl           | 0.000114575 | 1.90043 | 0.00047961  | 1.73554  | 0.47633     | 1.09501  |
| Cfb           | 0.0407151   | 1.89385 | 0.00184095  | 2.93318  | 0.145844    | -1.54879 |
| Cmklr1        | 0.000199631 | 1.88399 | 0.000401843 | 1.79921  | 0.727656    | 1.04712  |
| Il1r12        | 0.00139448  | 1.85051 | 0.0550399   | 1.38754  | 0.0873708   | 1.33366  |
| F11r          | 0.00141794  | 1.84164 | 0.00353139  | 1.71757  | 0.662259    | 1.07224  |
| Hvcn1         | 0.00503529  | 1.83163 | 0.0926663   | 1.39253  | 0.157826    | 1.31533  |
| SREBP1        | 6.83E-05    | 1.82063 | 0.0109575   | 1.37658  | 0.0227169   | 1.32258  |
| ANXA5         | 9.85E-05    | 1.80876 | 0.00522158  | 1.44596  | 0.066106    | 1.25091  |
| Rgs1          | 0.143023    | 1.8067  | 0.103293    | 1.94224  | 0.852607    | -1.07502 |
| Ctsl          | 0.00125585  | 1.80021 | 0.00508893  | 1.62658  | 0.504859    | 1.10674  |
| Ch25h         | 0.0645603   | 1.79863 | 0.53869     | 1.2034   | 0.192183    | 1.49462  |
| Trim47        | 0.000544303 | 1.79478 | 0.0305616   | 1.37608  | 0.0655351   | 1.30427  |
| Cer12         | 0.00443922  | 1.79222 | 0.14111     | 1.31137  | 0.0935903   | 1.36668  |
| Prosl         | 0.000241266 | 1.78049 | 0.000963522 | 1.63773  | 0.498848    | 1.08717  |
| Liph          | 0.0563535   | 1.7804  | 0.193833    | 1.46149  | 0.490053    | 1.21821  |
| CD163         | 0.017119    | 1.7706  | 0.316527    | 1.24715  | 0.12093     | 1.41971  |
| PLD4          | 0.00370087  | 1.76806 | 0.0147905   | 1.57945  | 0.507172    | 1.11942  |
| Ang           | 0.00477251  | 1.73744 | 0.0241039   | 1.52011  | 0.435988    | 1.14297  |
| Matb          | 0.00154446  | 1.73381 | 0.0275708   | 1.41617  | 0.176307    | 1.2243   |
| Igfb5         | 0.000574421 | 1.72311 | 0.00666668  | 1.48247  | 0.248062    | 1.16233  |
| Tgfb1         | 0.0021284   | 1.72207 | 0.0752716   | 1.32389  | 0.0934589   | 1.30076  |
| Hpgds         | 0.00424833  | 1.72044 | 0.0505567   | 1.40873  | 0.234066    | 1.22127  |
| Tlr4          | 0.000537548 | 1.71729 | 0.00391061  | 1.52263  | 0.345208    | 1.12785  |
| Gbgt1         | 0.00179431  | 1.71115 | 0.212024    | 1.20318  | 0.0253775   | 1.4222   |
| Grn           | 0.00475521  | 1.70734 | 0.0108415   | 1.59954  | 0.692198    | 1.06739  |
| Il1a          | 0.0105807   | 1.70645 | 0.213578    | 1.26848  | 0.126065    | 1.34527  |
| Il10ra        | 0.0083719   | 1.699   | 0.12043     | 1.3333   | 0.185576    | 1.27428  |
| Abi3          | 0.00305255  | 1.6926  | 0.0905764   | 1.30986  | 0.106398    | 1.2922   |
| 1810011O10Rik | 0.00189518  | 1.69168 | 0.00880924  | 1.52321  | 0.464794    | 1.1106   |
| CD200R        | 0.00154576  | 1.68706 | 0.0537894   | 1.32793  | 0.0977092   | 1.27044  |
| Csf1          | 0.00045447  | 1.6848  | 0.00558169  | 1.45891  | 0.236898    | 1.15484  |
| IFIT2         | 0.057961    | 1.68443 | 0.0123667   | 2.05826  | 0.442348    | -1.22193 |
| Il10rb        | 0.00015099  | 1.67843 | 0.0104613   | 1.35177  | 0.053042    | 1.24166  |
| Il1b          | 0.00825819  | 1.67016 | 0.148784    | 1.5215   | 0.73999     | 1.0977   |
| Inpp5d        | 0.00645653  | 1.66329 | 0.0810557   | 1.35129  | 0.216342    | 1.2309   |
| Mrl1          | 0.0032538   | 1.64723 | 0.0169234   | 1.46746  | 0.430974    | 1.1225   |
| ERBB2         | 0.000597599 | 1.64317 | 0.00588972  | 1.44473  | 0.279676    | 1.13736  |
| Cst7          | 0.00677717  | 1.63612 | 0.0193075   | 1.50854  | 0.612457    | 1.08457  |
| Stab1         | 0.000191951 | 1.63442 | 0.865162    | -1.01747 | 0.000137313 | 1.66297  |
| Tspan4        | 0.00649135  | 1.62326 | 0.0361208   | 1.4233   | 0.404872    | 1.14049  |
| Lair1         | 0.00971622  | 1.6049  | 0.033374    | 1.45387  | 0.545473    | 1.10388  |
| Hexb          | 0.00683149  | 1.60434 | 0.103761    | 1.29861  | 0.181414    | 1.23543  |
| Cfh           | 0.0524615   | 1.60189 | 0.058918    | 1.57985  | 0.95144     | 1.01395  |
| Tagap         | 0.0156787   | 1.59391 | 0.0118943   | 1.63172  | 0.892864    | -1.02372 |
| FXYD5         | 0.000183754 | 1.5915  | 0.300161    | 1.10659  | 0.00157297  | 1.4382   |
| Cx3cr1        | 0.00725037  | 1.58923 | 0.178324    | 1.23456  | 0.111237    | 1.28728  |
| CCL7          | 0.0930704   | 1.58743 | 0.465354    | 1.21291  | 0.312851    | 1.30878  |
| Haver2        | 0.0138078   | 1.58602 | 0.0946271   | 1.34344  | 0.331705    | 1.18056  |
| Abcc3         | 0.0130379   | 1.58197 | 0.379937    | 1.15878  | 0.0752937   | 1.3652   |
| ANPEP         | 0.0118915   | 1.57704 | 0.334999    | 1.17186  | 0.0818368   | 1.34576  |
| Fcgrt         | 7.95E-05    | 1.57472 | 0.00262962  | 1.35653  | 0.0987003   | 1.16084  |
| Olfml3        | 0.0193331   | 1.55738 | 0.249704    | 1.22448  | 0.175478    | 1.27187  |
| Tlr3          | 0.00259409  | 1.53543 | 0.00105328  | 1.61815  | 0.665293    | -1.05388 |
| Sparc         | 0.00244266  | 1.51311 | 0.0318146   | 1.30952  | 0.22401     | 1.15546  |
| Sic12a2       | 0.0171272   | 1.51231 | 0.0442859   | 1.40329  | 0.63484     | 1.07769  |
| Fgd2          | 0.0388163   | 1.50153 | 0.502551    | 1.13127  | 0.135616    | 1.3273   |
| St3gal6       | 8.79E-05    | 1.49458 | 0.0124309   | 1.23988  | 0.0261365   | 1.20543  |
| Csflr         | 0.00429939  | 1.48802 | 0.0412684   | 1.30223  | 0.277294    | 1.14267  |
| LAMP2a        | 0.000725014 | 1.4772  | 0.001095    | 1.44973  | 0.841391    | 1.01895  |
| ADAM17        | 0.000435741 | 1.47669 | 0.00158127  | 1.39708  | 0.533253    | 1.05699  |
| Nlrp3         | 0.0041462   | 1.4723  | 0.153858    | 1.18772  | 0.0803472   | 1.23961  |
| Manba         | 3.15E-05    | 1.46569 | 0.155248    | 1.10261  | 0.00055913  | 1.32928  |
| Ptgifm        | 0.015974    | 1.45589 | 0.0256066   | 1.40889  | 0.815721    | 1.03336  |
| TMEM51        | 0.00199614  | 1.45371 | 0.226738    | 1.13463  | 0.0258323   | 1.28123  |
| Tfeb          | 0.00284175  | 1.44963 | 0.0265805   | 1.2922   | 0.287538    | 1.12183  |
| Cyslr1        | 0.0731667   | 1.44859 | 0.0475526   | 1.51445  | 0.820317    | -1.04546 |
| Igga6         | 0.000423056 | 1.44784 | 0.0542818   | 1.18731  | 0.0291077   | 1.21943  |
| Serpinf1      | 0.0033105   | 1.447   | 0.0766086   | 1.22323  | 0.13372     | 1.18293  |
| Pmp22         | 0.0111501   | 1.44122 | 0.333878    | 1.13444  | 0.0775909   | 1.27042  |

|                |             |         |             |          |            |          |
|----------------|-------------|---------|-------------|----------|------------|----------|
| Tlr6           | 0.0135153   | 1.43931 | 0.0631653   | 1.29845  | 0.441082   | 1.10849  |
| Cxcr4          | 0.0324996   | 1.43558 | 0.26609     | 1.19397  | 0.248455   | 1.20236  |
| Bco2           | 0.0043644   | 1.42889 | 0.0298622   | 1.29103  | 0.355709   | 1.10678  |
| Gpr84          | 0.145503    | 1.42842 | 0.368811    | 1.24009  | 0.551746   | 1.15187  |
| Lgmn           | 0.00914399  | 1.42641 | 0.0782458   | 1.25162  | 0.288356   | 1.13965  |
| Adora3         | 0.084571    | 1.42499 | 0.252148    | 1.25657  | 0.521791   | 1.13403  |
| Blink          | 0.00752909  | 1.41892 | 0.048937    | 1.27501  | 0.360516   | 1.11287  |
| Siglec3 (CD33) | 0.0465529   | 1.41877 | 0.691468    | 1.06742  | 0.097992   | 1.32915  |
| Gas6           | 0.0198621   | 1.41218 | 0.054203    | 1.31867  | 0.612463   | 1.07092  |
| Npl            | 0.0150374   | 1.40901 | 0.0877076   | 1.25632  | 0.373014   | 1.12154  |
| Gpr34          | 0.00982046  | 1.40114 | 0.333714    | 1.12073  | 0.0692519  | 1.2502   |
| P2ry13         | 0.0316398   | 1.39463 | 0.944257    | 1.01003  | 0.0363205  | 1.38078  |
| Rasgrp3        | 0.0587854   | 1.391   | 0.781616    | 1.0466   | 0.0982521  | 1.32907  |
| Adamts1        | 0.0704261   | 1.39022 | 0.0961146   | 1.35031  | 0.865578   | 1.02956  |
| Sico2b1        | 0.00873572  | 1.38997 | 0.0568831   | 1.25287  | 0.357034   | 1.10943  |
| STAT3          | 0.00236719  | 1.38403 | 0.00484941  | 1.34162  | 0.731504   | 1.03161  |
| Eya4           | 0.0141997   | 1.3789  | 0.0500869   | 1.27993  | 0.52998    | 1.07732  |
| Gpr3711        | 0.000269897 | 1.37177 | 0.054454    | 1.1497   | 0.0185222  | 1.19316  |
| Rab31i1        | 0.00525522  | 1.36457 | 0.253158    | 1.11991  | 0.0557758  | 1.21846  |
| Cd83           | 0.00322685  | 1.36384 | 0.0065555   | 1.32267  | 0.734354   | 1.03113  |
| Mertk          | 0.000452109 | 1.36269 | 0.000682225 | 1.34346  | 0.840231   | 1.01431  |
| Tgfb1          | 0.00372604  | 1.36257 | 0.00124674  | 1.42993  | 0.600578   | -1.04944 |
| Myd88          | 0.028363    | 1.35365 | 0.0675326   | 1.27887  | 0.655462   | 1.05847  |
| Plxdc2         | 0.00167208  | 1.3514  | 0.0268621   | 1.21335  | 0.191764   | 1.11377  |
| P2rx7          | 0.0161104   | 1.35127 | 0.1879      | 1.16559  | 0.203078   | 1.1593   |
| CTS5           | 0.000615649 | 1.34038 | 0.0239396   | 1.18604  | 0.0918311  | 1.13013  |
| Leprel1        | 0.0124715   | 1.33257 | 0.0452025   | 1.24735  | 0.523548   | 1.06831  |
| Iga9           | 0.0449618   | 1.32927 | 0.409932    | 1.11662  | 0.200281   | 1.19044  |
| Sic46a1        | 0.0198222   | 1.32605 | 0.0672446   | 1.23807  | 0.535506   | 1.07106  |
| Gpr56          | 0.000702532 | 1.32443 | 0.48092     | 1.04898  | 0.00306546 | 1.26259  |
| Cst3           | 0.00112004  | 1.31443 | 0.0518518   | 1.15461  | 0.0761673  | 1.13842  |
| IL6ST          | 0.000405796 | 1.31133 | 0.099318    | 1.11107  | 0.0144646  | 1.18024  |
| Serpine2       | 0.00171798  | 1.30772 | 0.0988004   | 1.13203  | 0.0585665  | 1.15519  |
| Lrrc3          | 0.0569794   | 1.30697 | 0.330273    | 1.13956  | 0.307787   | 1.14691  |
| Olfir920       | 0.15494     | 1.30427 | 0.0727751   | 1.40812  | 0.671916   | -1.07962 |
| Entpd1         | 0.0109413   | 1.30312 | 0.208632    | 1.12733  | 0.133016   | 1.15593  |
| X99384         | 0.0441306   | 1.30245 | 0.303451    | 1.13673  | 0.275575   | 1.14579  |
| Flt1           | 0.0050014   | 1.30086 | 0.683771    | -1.03381 | 0.00213364 | 1.34484  |
| Igfbp5         | 0.00150321  | 1.29904 | 0.143954    | 1.10978  | 0.0341321  | 1.17054  |
| Epb4.112       | 0.00493596  | 1.28602 | 0.0445914   | 1.1823   | 0.288432   | 1.08773  |
| Lmo2           | 0.0185529   | 1.28595 | 0.106644    | 1.17764  | 0.370288   | 1.09197  |
| Eng            | 0.0141072   | 1.28512 | 0.847737    | 1.01781  | 0.020859   | 1.26264  |
| Ttc28          | 0.00573946  | 1.28117 | 0.0949876   | 1.14704  | 0.171344   | 1.11694  |
| Sall1          | 0.0207205   | 1.27141 | 0.431618    | 1.07797  | 0.0959298  | 1.17944  |
| Siglech        | 0.11154     | 1.26682 | 0.66396     | 1.06395  | 0.231293   | 1.19068  |
| MAP3K8         | 0.0592244   | 1.25518 | 0.0617134   | 1.2521   | 0.982643   | 1.00247  |
| Bach1          | 0.0127456   | 1.25289 | 0.530457    | 1.05255  | 0.0451835  | 1.19034  |
| Ccr5           | 0.134763    | 1.25009 | 0.91652     | 1.01517  | 0.161089   | 1.23142  |
| Nfk1           | 0.00260448  | 1.24389 | 0.0108889   | 1.19232  | 0.495137   | 1.04325  |
| Mye            | 0.113398    | 1.23441 | 0.156069    | 1.20569  | 0.853455   | 1.02382  |
| 9030625A04Rik  | 0.102726    | 1.23414 | 0.218494    | 1.16822  | 0.65673    | 1.05643  |
| Spta13         | 0.249399    | 1.23284 | 0.190838    | 1.27038  | 0.865934   | -1.03046 |
| Ly96           | 0.013876    | 1.22791 | 0.175135    | 1.11063  | 0.193406   | 1.1056   |
| Ptgs1          | 0.125735    | 1.2214  | 0.401103    | 1.11248  | 0.46058    | 1.09791  |
| cathepsin      | 0.0562379   | 1.19136 | 0.0975127   | 1.16133  | 0.76704    | 1.02586  |
| Sulti1a1       | 0.328743    | 1.1892  | 0.108475    | 1.34039  | 0.496298   | -1.12714 |
| Scarb2         | 0.0178329   | 1.18804 | 0.354761    | 1.06381  | 0.108803   | 1.11678  |
| Cux1           | 0.0413345   | 1.1793  | 0.408681    | 1.06484  | 0.187382   | 1.10749  |
| Tmem119        | 0.211704    | 1.17383 | 0.770403    | -1.03719 | 0.130057   | 1.21748  |
| Ctnbp2n1       | 0.0153418   | 1.17061 | 0.233433    | 1.07413  | 0.156077   | 1.08982  |
| Ppfi4          | 0.0839769   | 1.1683  | 0.327309    | 1.08883  | 0.415023   | 1.07299  |
| Sema4d         | 0.0428125   | 1.16746 | 0.319694    | 1.07466  | 0.254885   | 1.08635  |
| H2-Oa          | 0.617205    | 1.16598 | 0.0944273   | 1.71116  | 0.221704   | -1.46757 |
| Ppp1r15a       | 0.101171    | 1.16508 | 0.370484    | 1.08412  | 0.423293   | 1.07467  |
| Jam2           | 0.0300432   | 1.16441 | 0.40056     | 1.0565   | 0.146565   | 1.10215  |
| Pla2g15        | 0.020544    | 1.15957 | 1.14467     | 1.09199  | 0.310272   | 1.06189  |
| Sall3          | 0.118385    | 1.13574 | 0.0231138   | 1.21455  | 0.396373   | -1.06939 |
| SLC2A1         | 0.0960429   | 1.11775 | 0.0048151   | 1.23016  | 1.147183   | -1.10056 |
| Fgfr1          | 0.136692    | 1.11581 | 0.163686    | 1.10745  | 0.915489   | 1.00755  |
| Gal3st4        | 0.687216    | 1.09531 | 0.745125    | -1.07619 | 0.469741   | 1.17877  |
| Lrrc8a         | 0.224626    | 1.07963 | 0.0376645   | 1.14787  | 0.327013   | -1.06321 |
| RHOA           | 0.329269    | 1.07073 | 0.903039    | 1.00843  | 0.390402   | 1.06178  |
| Arhgap22       | 0.417861    | 1.0635  | 0.868842    | 1.01249  | 0.516077   | 1.05038  |
| C5aR           | 0.737144    | 1.06094 | 0.600151    | 1.09707  | 0.849108   | -1.03405 |
| Sico1a4        | 0.732857    | 1.05758 | 0.838556    | 1.03394  | 0.890178   | 1.02287  |
| Sic1a3         | 0.444107    | 1.04961 | 0.329762    | 1.06401  | 0.827841   | -1.01373 |
| Escr           | 0.889425    | 1.0167  | 0.492379    | -1.08591 | 0.411307   | 1.10404  |
| Pde3b          | 0.927551    | 1.0067  | 0.854662    | 1.01354  | 0.926439   | -1.0068  |
| MAPT           | 0.000724615 | -1.3489 | 0.00384783  | -1.27306 | 0.426034   | -1.05957 |

## Cluster2 genes

| Column ID  | p-value(TE4 vs. TEKO) | Fold-Change(TE4 vs. TEKO) | p-value(TE3 vs. TEKO) | Fold-Change(TE3 vs. TEKO) | p-value(TE4 vs. TE3) | Fold-Change(TE4 vs. TE3) |
|------------|-----------------------|---------------------------|-----------------------|---------------------------|----------------------|--------------------------|
| LDLR       | 0.000309098           | -2.20786                  | 0.0419929             | -1.45934                  | 0.0278378            | -1.51291                 |
| Map2k1     | 1.17E-05              | -1.79942                  | 0.00514887            | -1.34943                  | 0.00671779           | -1.33347                 |
| D3Bwg0562e | 0.000377384           | -1.7616                   | 0.0390087             | -1.32441                  | 0.0364987            | -1.3301                  |
| Dagla      | 0.0160244             | -1.75968                  | 0.320559              | -1.23858                  | 0.112473             | -1.42072                 |
| Grm1       | 0.00361961            | -1.73829                  | 0.119596              | -1.30346                  | 0.0931706            | -1.33359                 |
| Unc13a     | 0.000320395           | -1.72431                  | 0.0165937             | -1.37237                  | 0.0708561            | -1.25645                 |
| Slc24a3    | 0.000669001           | -1.70408                  | 0.0575621             | -1.29256                  | 0.0426511            | -1.31838                 |
| Large      | 3.74E-05              | -1.66955                  | 0.00483476            | -1.34133                  | 0.0264338            | -1.2447                  |
| Rapgef5    | 0.000249838           | -1.66364                  | 0.0312408             | -1.28886                  | 0.0304043            | -1.29078                 |
| SREBP2     | 1.00E-05              | -1.66002                  | 0.00154109            | -1.35126                  | 0.0185944            | -1.2285                  |
| Npnt       | 0.034942              | -1.6563                   | 0.368276              | -1.2237                   | 0.184523             | -1.35352                 |
| Rilpl1     | 0.00184089            | -1.60806                  | 0.113198              | -1.23589                  | 0.0539593            | -1.30114                 |
| Ppp1r9a    | 0.000364812           | -1.56777                  | 0.0108982             | -1.33039                  | 0.115568             | -1.17843                 |
| Csmc3      | 5.66E-06              | -1.56545                  | 0.000188623           | -1.37989                  | 0.0735489            | -1.13448                 |
| Ptxna4     | 0.0147924             | -1.564                    | 0.162053              | -1.26986                  | 0.219132             | -1.23163                 |
| Fabp3      | 1.66E-06              | -1.52556                  | 0.0138874             | -1.1678                   | 0.000235166          | -1.30636                 |
| Sezf3      | 0.000776023           | -1.52445                  | 0.0214607             | -1.29411                  | 0.123707             | -1.17799                 |
| Khdrbs3    | 5.95E-05              | -1.51621                  | 0.00680801            | -1.267                    | 0.0310788            | -1.19669                 |
| Synj1      | 0.000137696           | -1.51136                  | 0.00265141            | -1.34009                  | 0.160332             | -1.1278                  |
| Gas7       | 3.08E-05              | -1.50796                  | 0.00101526            | -1.32905                  | 0.091214             | -1.13461                 |
| Abi1       | 0.000759877           | -1.4943                   | 0.0737562             | -1.20139                  | 0.037216             | -1.24381                 |
| Basp1      | 0.000872711           | -1.48858                  | 0.0108038             | -1.32247                  | 0.237165             | -1.1256                  |
| RAP2B      | 0.00182829            | -1.48087                  | 0.0443958             | -1.25621                  | 0.134356             | -1.17884                 |
| Epn2       | 0.00560626            | -1.47269                  | 0.13998               | -1.20533                  | 0.115293             | -1.22181                 |
| Gpm6a      | 4.15E-05              | -1.46094                  | 0.000845295           | -1.31788                  | 0.141591             | -1.10856                 |
| Gnaq       | 0.00100751            | -1.45335                  | 0.0935013             | -1.17887                  | 0.0377851            | -1.23284                 |
| Chst7      | 0.0187761             | -1.45333                  | 0.591725              | -1.08089                  | 0.0544581            | -1.34457                 |
| Snn        | 0.000433403           | -1.44825                  | 0.277766              | -1.09739                  | 0.00427924           | -1.31972                 |
| Rtn1       | 0.000555095           | -1.43555                  | 0.00667577            | -1.2976                   | 0.241466             | -1.10631                 |
| Nrip1      | 0.00121648            | -1.42417                  | 0.0897655             | -1.17502                  | 0.0471374            | -1.21204                 |
| Napg       | 3.67E-05              | -1.42091                  | 0.00335484            | -1.23585                  | 0.0366758            | -1.14975                 |
| Erf        | 0.035313              | -1.41375                  | 0.0897666             | -1.31192                  | 0.624739             | -1.07762                 |
| Arhgap12   | 0.0902892             | -1.41214                  | 0.548807              | -1.12403                  | 0.249833             | -1.25632                 |
| Chl1       | 0.000259822           | -1.41021                  | 0.0214969             | -1.20423                  | 0.0455764            | -1.17105                 |
| Rtn4r1     | 0.014493              | -1.40067                  | 0.0887013             | -1.24854                  | 0.360689             | -1.12184                 |
| Mras       | 0.000114326           | -1.39683                  | 0.00612844            | -1.2288                   | 0.0660625            | -1.13675                 |
| BCL6       | 0.0387266             | -1.39105                  | 0.806574              | 1.03698                   | 0.02381              | -1.44249                 |
| Mezf2      | 0.00709755            | -1.38995                  | 0.109318              | -1.19716                  | 0.178192             | -1.16104                 |
| Rap1gds1   | 1.53E-05              | -1.38545                  | 0.000709039           | -1.24726                  | 0.0618972            | -1.11079                 |
| Tppp       | 9.02E-05              | -1.38445                  | 0.0047738             | -1.2255                   | 0.065819             | -1.12971                 |
| IL34       | 0.00586911            | -1.38183                  | 0.0212315             | -1.29608                  | 0.534749             | -1.06615                 |
| Camk2n1    | 0.0115914             | -1.37813                  | 0.077941              | -1.23511                  | 0.341765             | -1.1158                  |
| Ptpnz1     | 3.31E-06              | -1.37454                  | 0.00103682            | -1.19757                  | 0.00731958           | -1.14778                 |
| Scamp5     | 3.08E-05              | -1.36993                  | 0.00238817            | -1.21591                  | 0.0418833            | -1.12667                 |
| Smad3      | 0.00445527            | -1.36731                  | 0.0499482             | -1.22086                  | 0.244895             | -1.11995                 |
| BMP1       | 0.147769              | -1.35689                  | 0.538243              | -1.13424                  | 0.384251             | -1.1963                  |
| D18Erd653e | 0.00597876            | -1.35649                  | 0.119027              | -1.17069                  | 0.14308              | -1.15871                 |
| Rock2      | 0.00242534            | -1.35451                  | 0.0451077             | -1.19994                  | 0.166824             | -1.12882                 |
| Slc2a3     | 0.0237989             | -1.3482                   | 0.0841058             | -1.24582                  | 0.516283             | -1.08218                 |
| Lrp12      | 0.021046              | -1.34804                  | 0.231607              | -1.15546                  | 0.203356             | -1.16667                 |
| Rab6b      | 0.000582272           | -1.34562                  | 0.0113065             | -1.21821                  | 0.166435             | -1.10458                 |
| Beclin     | 6.06E-05              | -1.33923                  | 0.0112761             | -1.16561                  | 0.0194568            | -1.14895                 |
| Tanc2      | 0.000240713           | -1.33145                  | 0.00181253            | -1.25381                  | 0.331113             | -1.06193                 |
| Abhd6      | 0.0203293             | -1.33078                  | 0.263197              | -1.13661                  | 0.172714             | -1.17083                 |
| Sesn1      | 0.0119296             | -1.33013                  | 0.162884              | -1.15766                  | 0.184165             | -1.14899                 |
| Ptms       | 0.00405366            | -1.32395                  | 0.0646758             | -1.17955                  | 0.183485             | -1.12242                 |
| Jarid2     | 0.00329558            | -1.32391                  | 0.0630673             | -1.17519                  | 0.159103             | -1.12655                 |
| TPP2       | 1.83E-05              | -1.31958                  | 0.0110245             | -1.13939                  | 0.00526059           | -1.15815                 |
| Spire1     | 0.00015093            | -1.31943                  | 0.00296569            | -1.21571                  | 0.15846              | -1.08532                 |
| Acvr1      | 0.0139155             | -1.31895                  | 0.498335              | -1.07145                  | 0.0541069            | -1.23099                 |
| SRB1       | 0.0355211             | -1.31641                  | 0.349395              | -1.12181                  | 0.19886              | -1.17347                 |
| Rgmb       | 0.000915205           | -1.31527                  | 0.0105104             | -1.21475                  | 0.250921             | -1.08275                 |
| Tmem144    | 0.040583              | -1.31451                  | 0.365015              | -1.12074                  | 0.210949             | -1.17289                 |
| Usp2       | 0.017113              | -1.31186                  | 0.197447              | -1.14634                  | 0.202793             | -1.14439                 |
| Zmynd8     | 0.00547592            | -1.29447                  | 0.0895581             | -1.15548                  | 0.174176             | -1.12029                 |
| Ahcy11     | 0.000188001           | -1.29274                  | 0.0035149             | -1.19813                  | 0.166579             | -1.07897                 |
| Gmfb       | 0.000461084           | -1.28941                  | 0.00578603            | -1.20122                  | 0.233176             | -1.07342                 |
| Gtf2h2     | 0.00225717            | -1.27351                  | 0.0842068             | -1.12942                  | 0.0880739            | -1.12757                 |
| Sv2a       | 0.000550415           | -1.27056                  | 0.00551338            | -1.19423                  | 0.276095             | -1.06392                 |
| Gapdh      | 1.65E-05              | -1.2692                   | 0.00346613            | -1.14206                  | 0.0147904            | -1.11133                 |
| Omg        | 0.000319997           | -1.26408                  | 0.00178414            | -1.21083                  | 0.407494             | -1.04397                 |
| Tspan7     | 0.000772125           | -1.26113                  | 0.00331735            | -1.21233                  | 0.485902             | -1.04025                 |
| Mapk14     | 0.00468377            | -1.26093                  | 0.120989              | -1.12173                  | 0.114847             | -1.1241                  |
| Psd        | 0.0688879             | -1.25991                  | 0.761995              | -1.03703                  | 0.119469             | -1.21492                 |
| Ap3d1      | 0.00166954            | -1.24506                  | 0.0189102             | -1.16287                  | 0.252336             | -1.07068                 |
| Flot1      | 0.00222343            | -1.23453                  | 0.00502224            | -1.20677                  | 0.69678              | -1.023                   |

|          |             |          |             |          |            |          |
|----------|-------------|----------|-------------|----------|------------|----------|
| Mecp2    | 0.00866455  | -1.23064 | 0.0428657   | -1.16437 | 0.433546   | -1.05691 |
| ATG12    | 0.00556503  | -1.22866 | 0.0580137   | -1.13961 | 0.255815   | -1.07814 |
| Gpm6b    | 0.00441703  | -1.22781 | 0.0433902   | -1.14487 | 0.271992   | -1.07244 |
| Scoc     | 2.81E-05    | -1.2274  | 0.0122629   | -1.10351 | 0.00770951 | -1.11226 |
| Ctce     | 2.89E-05    | -1.22654 | 0.00203164  | -1.13747 | 0.0455743  | -1.07831 |
| Polr2b   | 0.000471957 | -1.21591 | 0.0393743   | -1.10433 | 0.044849   | -1.10103 |
| Cbr1     | 3.85E-05    | -1.21114 | 0.0028922   | -1.12568 | 0.0442517  | -1.07591 |
| B4galnt4 | 0.0134554   | -1.21006 | 0.318843    | -1.07273 | 0.0972031  | -1.12802 |
| Ophn1    | 0.0119576   | -1.20467 | 0.127318    | -1.11087 | 0.232462   | -1.08443 |
| Eps15l1  | 0.00132337  | -1.20399 | 0.0101143   | -1.14884 | 0.336048   | -1.048   |
| Nr3c1    | 0.00820336  | -1.20236 | 0.0164712   | -1.17755 | 0.735349   | -1.02107 |
| Apbb2    | 0.030459    | -1.19613 | 0.0898952   | -1.14556 | 0.572984   | -1.04414 |
| Dnajb4   | 0.0203775   | -1.19518 | 0.168421    | -1.10463 | 0.269789   | -1.08198 |
| Kcnd1    | 0.148208    | -1.18866 | 0.709567    | -1.04397 | 0.270221   | -1.13859 |
| Asph     | 0.00231449  | -1.18759 | 0.0305738   | -1.11862 | 0.221971   | -1.06166 |
| Extl3    | 0.000526888 | -1.18673 | 0.00705351  | -1.12928 | 0.222572   | -1.05087 |
| TARDBP   | 0.00279937  | -1.18582 | 0.0406609   | -1.11291 | 0.203787   | -1.06551 |
| Map3k7   | 0.000538797 | -1.18502 | 0.0147371   | -1.1127  | 0.125135   | -1.06499 |
| Exoc1    | 0.0112484   | -1.18386 | 0.0954048   | -1.10958 | 0.284834   | -1.06695 |
| Mcoln1   | 0.00681781  | -1.18241 | 0.0102804   | -1.16974 | 0.843021   | -1.01083 |
| Pitpm1   | 0.0336495   | -1.18222 | 0.371961    | -1.06811 | 0.176709   | -1.10683 |
| Vta1     | 0.00150016  | -1.18122 | 0.0141493   | -1.12674 | 0.289394   | -1.04836 |
| Hprt1    | 0.011421    | -1.17936 | 0.0948105   | -1.10749 | 0.28947    | -1.06489 |
| Sec22b   | 0.00136725  | -1.1752  | 0.140521    | -1.0662  | 0.0320661  | -1.10223 |
| EFNB1    | 0.0981734   | -1.17118 | 0.233214    | -1.11774 | 0.609824   | -1.04781 |
| Pik3r4   | 0.00622924  | -1.17082 | 0.223534    | -1.06502 | 0.0755792  | -1.09934 |
| Golga3   | 0.0029854   | -1.16262 | 0.0546442   | -1.09284 | 0.166794   | -1.06385 |
| Agpat3   | 0.00670962  | -1.15257 | 0.0573559   | -1.09748 | 0.295493   | -1.0502  |
| Bin1     | 0.0735039   | -1.15177 | 0.238045    | -1.09443 | 0.497444   | -1.05239 |
| Ncam1    | 0.000156102 | -1.14987 | 0.000377163 | -1.13554 | 0.659526   | -1.01261 |
| Sbf2     | 0.0399233   | -1.14474 | 0.263172    | -1.07236 | 0.294203   | -1.0675  |
| Snx24    | 0.0728218   | -1.14205 | 0.747774    | -1.02281 | 0.130041   | -1.11659 |
| Rbbp9    | 0.0160783   | -1.13682 | 0.0688279   | -1.09713 | 0.463962   | -1.03618 |
| Gnas     | 0.00960942  | -1.12375 | 0.0652838   | -1.08136 | 0.343819   | -1.0392  |
| Il18     | 0.111431    | -1.11969 | 0.0831798   | -1.1321  | 0.871293   | 1.01108  |
| Abhd12   | 0.0379614   | -1.1192  | 0.254892    | -1.06033 | 0.292116   | -1.05552 |
| ADAM10   | 0.0157234   | -1.11919 | 0.117208    | -1.07117 | 0.305692   | -1.04484 |
| Rhob     | 0.251952    | -1.11406 | 0.99404     | 1.00069  | 0.249074   | -1.11483 |
| Rptor    | 0.213204    | -1.08844 | 0.140056    | -1.1069  | 0.799885   | 1.01696  |
| Jmy      | 0.41188     | -1.07099 | 0.53211     | -1.05334 | 0.840685   | -1.01676 |
| Nav2     | 0.347778    | -1.05155 | 0.772545    | 1.01538  | 0.22566    | -1.06772 |
| Acp2     | 0.39164     | -1.03381 | 0.362765    | -1.03601 | 0.955626   | 1.00213  |

#### GeneGo pathway analysis for cluster1 and cluster2 microglial genes - Top 15 pathways

| Cluster1 gene pathways                                                                     | Genes in data                                                                                                                                                                    |
|--------------------------------------------------------------------------------------------|----------------------------------------------------------------------------------------------------------------------------------------------------------------------------------|
| Immune response, Alternative complement pathway                                            | C3b, C5aR, Factor Bb, C3aR, C3 convertase (C3bBb), iC3b, Factor H, C3a, Factor B, C3, C5 convertase (C3b2Bb), Factor Ba                                                          |
| Immune response, IL-10 signaling pathway                                                   | STAT3, IL-1 alpha, IL10RA, ICAM1, IL-1 beta, CD86, Heme oxygenase 1, IL10RB, Fc gamma RI, SOCS3, NF-kB, CD14, SHIP, IL-10 receptor, NF-kB1 (p50)                                 |
| Immune response, HSP60 and HSP70/TLR signaling pathway                                     | CD69, CD83, TLR4, ICAM1, MyD88, IL-1 beta, CD86, NF-kB, TLR2, TPL2/MAP3K8, CD14, NF-kB1 (p105), MD-2                                                                             |
| Th17 cells in CF                                                                           | STAT3, TLR4, ICAM1, MyD88, IL-1 beta, CD86, NF-kB, TGF-beta 1, TGF-beta receptor type I, CD14, TGF-beta receptor type II, MD-2                                                   |
| Immune response, Classical complement pathway                                              | C3b, C5aR, C4, C3aR, iC3b, C1q, C3dg, C3a, C3, C4a, C3c, C4b                                                                                                                     |
| Protein folding and maturation, Angiotensin system maturation                              | Angiotensin II, Angiotensin IV, Angiotensin I, Angiotensin III, Cathepsin D, Angiotensin II, Angiotensin III, Cathepsin D, Angiotensin (1-7), Angiotensinogen, Angiotensin (1-9) |
| Immune response, TLR2 and TLR4 signaling pathways                                          | TLR4, MyD88, IL-1 beta, TLR1, NF-kB, TLR2, TPL2/MAP3K8, CD14, NF-kB1 (p105), TLR6, MD-2                                                                                          |
| NALP3 inflammasome activation in age-related macular degeneration (AMD)                    | CARD5, IL-1 alpha, IL-1 beta, C1q, P2X7, NF-kB, Cathepsin B, TLR2, NALP3                                                                                                         |
| Signal transduction, NF-kB activation pathways                                             | IL-1 alpha, NF-kB2 (p100), TLR4, MyD88, IL-1 beta, NF-kB2 (p52), NF-kB, TLR2, NF-kB1 (p105), NF-kB1 (p50)                                                                        |
| Immune response, T regulatory cell-mediated modulation of antigen-presenting cell function | CCL5, NF-kB2 (p100), ICAM1, IRF8, LAG3, DAB2, CCR5, CD86, NF-kB2 (p52), NF-kB, ENP1                                                                                              |
| Immune response, Bacterial infections in normal airways                                    | TLR4, MyD88, IL-1 beta, TLR1, NF-kB, TLR2, CD14, MD-2                                                                                                                            |
| PDE4 regulation of cytochemokine expression in arthritis                                   | CCL5, NF-kB p50/p50, IL-1 alpha, IL-1 beta, CCL2, MIP-1-beta, IP10, CXCL1, NF-kB1 (p50)                                                                                          |
| Development, Cytokine-mediated regulation of megakaryopoiesis                              | Maflb, p21, STAT3, IL-1 alpha, IL-1 beta, CXCR4, NF-kB, c-Myc, gp130                                                                                                             |
| Immune response, C3a signaling                                                             | CCL5, RhoA, IL-1 beta, CCL2, CD86, C3aR, TGF-beta 1, C3a                                                                                                                         |
| Rheumatoid arthritis (general schema)                                                      | TLR4, ICAM1, IL-1 beta, CD86, Fc gamma RI, TLR2, TGF-beta, CSF1                                                                                                                  |

| Cluster2 gene Pathways                                                                      | Genes In Data                                                                                       |
|---------------------------------------------------------------------------------------------|-----------------------------------------------------------------------------------------------------|
| Immune response, Gastrin in inflammatory response                                           | p38Alpha (MAPK14), MEK2D, G-protein alpha-q/11, MEF2, G-protein alpha-q, TAK1(MAP3K7), MEK1(MAP2K1) |
| Development, G-protein-mediated regulation of MAPK-ERK signaling                            | MR-GEF, G-protein alpha-s, GMF, G-protein alpha-q/11, MEK1(MAP2K1), M-Ras                           |
| G-protein signaling, G-Protein alpha-12 signaling pathway                                   | ROCK, p38 MAPK, MR-GEF, MEK1(MAP2K1), M-Ras                                                         |
| G-protein signaling, Rap2B regulation pathway                                               | RAP-2B, MR-GEF, M-Ras                                                                               |
| Development, Differentiation of white adipocytes                                            | MEK1/2, p38Alpha (MAPK14), RIP140, TAK1(MAP3K7), MEK1(MAP2K1)                                       |
| Cytoskeleton remodeling, Cytoskeleton remodeling                                            | ROCK, ROCK2, SMAD3, p38 MAPK, TAK1(MAP3K7), MEK1(MAP2K1)                                            |
| Transcription, PPAR Pathway                                                                 | p38Alpha (MAPK14), p38 MAPK, G-protein alpha-s, TAK1(MAP3K7), MEK1(MAP2K1)                          |
| Development, Role of IL-8 in angiogenesis                                                   | LDLR, SREBP2 (nuclear), SREBP2 precursor, SREBP2 (Golgi membrane), MEK1(MAP2K1)                     |
| Reproduction, Gonadotropin-releasing hormone (GnRH) signaling                               | p38Alpha (MAPK14), MEK2D, G-protein alpha-s, G-protein alpha-q/11, MEK1(MAP2K1)                     |
| Regulation of lipid metabolism, Stimulation of Arachidonic acid production by ACM receptors | DGL-alpha, ADAM10, p38 MAPK, G-protein alpha-q, MEK1(MAP2K1)                                        |
| Regulation of lipid metabolism, Regulation of lipid metabolism via LXR, NF-Y and SREBP      | LDLR, SREBP2 (nuclear), SREBP2 precursor, SREBP2 (Golgi membrane)                                   |
| G-protein signaling, Rap1A regulation pathway                                               | Rap1GDS1, MR-GEF, G-protein alpha-s, M-Ras                                                          |
| Apoptosis and survival, Anti-apoptotic action of Gastrin                                    | ROCK, G-protein alpha-q/11, G-protein alpha-q, MEK1(MAP2K1)                                         |
| G-protein signaling, Rap2A regulation pathway                                               | MR-GEF, G-protein alpha-s, M-Ras                                                                    |
| G-protein signaling, Regulation of Cyclic AMP levels by ACM                                 | RAP-2B, G-protein alpha-s, G-protein alpha-q/11, G-protein alpha-q                                  |
